# Supplementary material for: Convective Gusts Nowcasting Based on Radar Reflectivity and a Deep Learning Algorithm
Source: Copernicus journal article supplement (doi:10.5194/gmd-2022-272), 2023-01-09
Supplement: Supplementary file [file gmd-2022-272-RC1-supplement.pdf]

Convective wind gusts (GCs) cause great structural damage and serious hazards. This paper designs a physics-constrained model (namely by an improved PhyDNet) for 0-2 h of quantitative CGs nowcasting with a spatial resolution of  $0.01^\circ \times 0.01^\circ$  and a 6-minute temporal resolution. The structure of the forecast neural network is designed interesting, which contains a temporal attention module. In addition, this model combines sufficient situ observations and radar data. I admire the author's dedication to such detailed work. I only have some minor points to make before being published.

## I DATA

- ① The wind data the authors used is from automatic weather stations (AWSs), and they are few wind observation data on the seacoast (and even over the sea) from Figure 1b. I wonder how to interpolate the wind data over the sea, whether to set it to 0 directly. Please clarify the detailed information on the IDW interpolation method.
- ② If the wind data over the sea is 0, please give some analyses on whether this approach affects model performance, such as causing underestimations on PWGS to some extent.
- ③ The same interpolation problem also emerges in radar reflectivity. There are 10 weather radar stations in eastern China, and how to interpolate them into gridded data. I suggest the authors exhibit some exemplificative image pairs for ASWS/radar data and processed gridded data.
- ④ Is the data the authors used open-source? If so, please clarify the web links of them.

## II MODEL

- ① Please clarify the detailed structures of the convolutional encoder and decoder in Appendix, and the feature map shapes of  $h^E$ ,  $h^p$ ,  $h^c$ , and  $h^m$ .
- ② What is the difference between  $h^D$  and  $h^m$ ? In Equation (4),  $h^D$  is the summation of  $h^p$  and  $h^c$ . However, in Figure 3,  $h^D$  is from some transformation of  $h^m$ , and  $h^m$  is the summation of  $h^p$  and  $h^c$ . Please unify the illustration.
- ③ From the example of Figure 3, I wonder if there are 4 individual attention modules corresponding to the output length. And the effect of the attention is to find the most significant historical information from the input sequence. For example, when predicting  $t$ , the attention module can assign weights for  $\{h_{t-4}^m, h_{t-3}^m, h_{t-2}^m, h_{t-1}^m\}$ , and when prediction  $t + 1$ , the attention module can assign weights for  $\{h_{t-4}^m, h_{t-3}^m, h_{t-2}^m, h_{t-1}^m\}$  as well, or for  $\{h_{t-3}^m, h_{t-2}^m, h_{t-1}^m, h_t^m\}$ .
- ④ There is no  $k$  on the right side of Equation (1), how to obtain  $s_{tk}$  ( $\forall k \in [1, K]$ )?
- ⑤ Please give the detailed calculation process of PhyDNet and ConvLSTM in Appendix.
- ⑥ About the physics-constraint concept mentioned in Introduction and Model architecture (namely PhyDNet), I think the authors should cite the “inductive biases” from [doi.org/10.1038/s42254-021-00314-5](https://doi.org/10.1038/s42254-021-00314-5), which can be interpreted by designing specialized network architectures that implicitly embed prior knowledge and satisfy a set of given physical laws.

## III EXPERIMENT

- ① Please append an ablation study on the proposed attention module.
